# Supplementary material for: Wearable Liquid Metal Composite with Skin-Adhesive Chitosan–Alginate–Chitosan Hydrogel for Stable Electromyogram Signal Monitoring
Source: MDPI journal article supplement (doi:10.3390/polym15183692), 2023-09-07
Supplement: s1 [file s1]

## **Supplementary Information**

### **Wearable liquid metal composite with skin-adhesive chitosan-alginate-chitosan hydrogel for stable electromyogram signal monitoring**

**Jaehyon Kim<sup>†</sup>, Yewon Kim, Jaebeom Lee, Mikyung Shin<sup>\*</sup>, Donghee Son<sup>\*</sup>**

<sup>†</sup>These authors contributed equally to this work

<sup>\*</sup>Correspondence to be addressed to: *daniel3600@g.skku.edu*

**This PDF file includes:**

Supplementary Figure. 1

Supplementary Figure

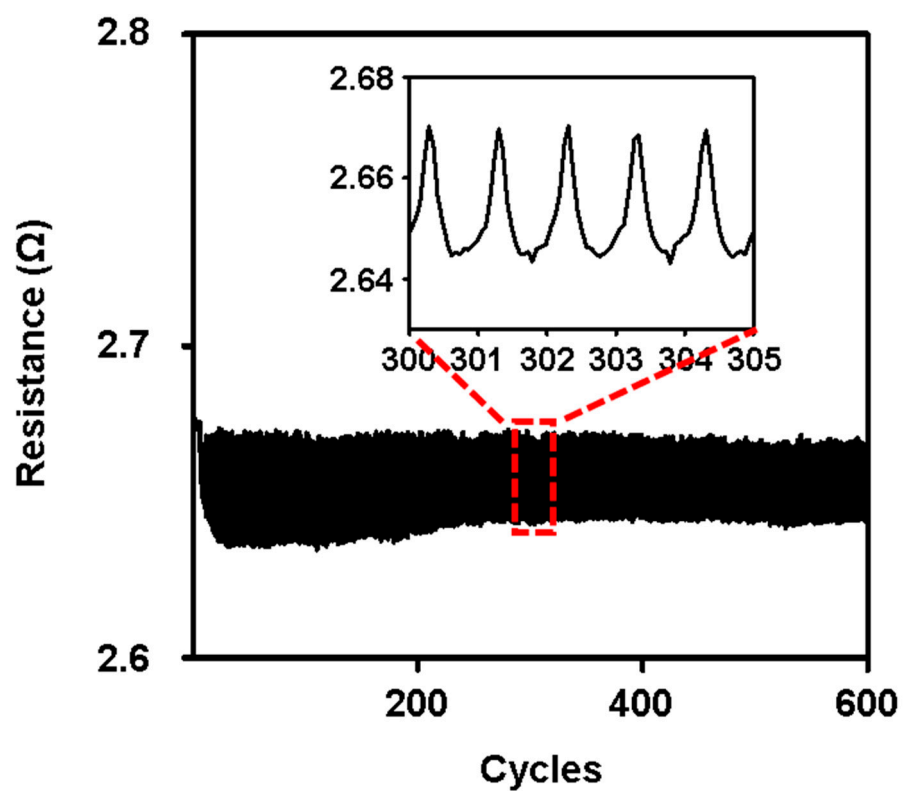

**Figure S1.** Cyclic stretching test of the EGaIn-SEBS composite under 50% strain and enlarged part of the graph (inset).
